# Supplementary material for: Influence networks based on coexpression improve drug target discovery for the development of novel cancer therapeutics
Source: PubMed Central journal article supplement (PMC3922430; doi:10.1186/1752-0509-8-12), 2014-02-05
Supplement: 1752-0509-8-12-S1.pdf [file 1752-0509-8-12-S1.pdf]

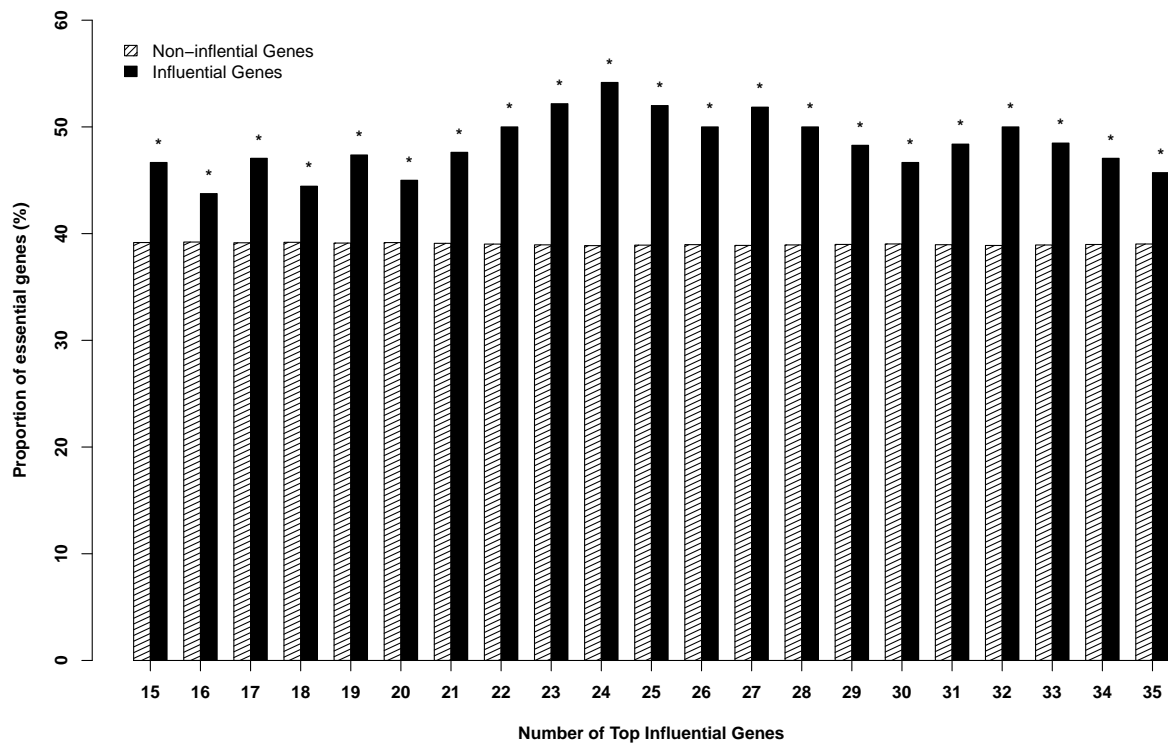

Supplemental Figure 1. Influential genes in a breast tumor coexpression network are enriched for essential genes at a range of thresholds. "\*" indicates  $p \leq .001$  calculated using the cumulative binomial distribution.
