# Supplementary material for: Influence networks based on coexpression improve drug target discovery for the development of novel cancer therapeutics
Source: PubMed Central journal article supplement (PMC3922430; doi:10.1186/1752-0509-8-12), 2014-02-05
Supplement: 1752-0509-8-12-S3.pdf [file 1752-0509-8-12-S3.pdf]

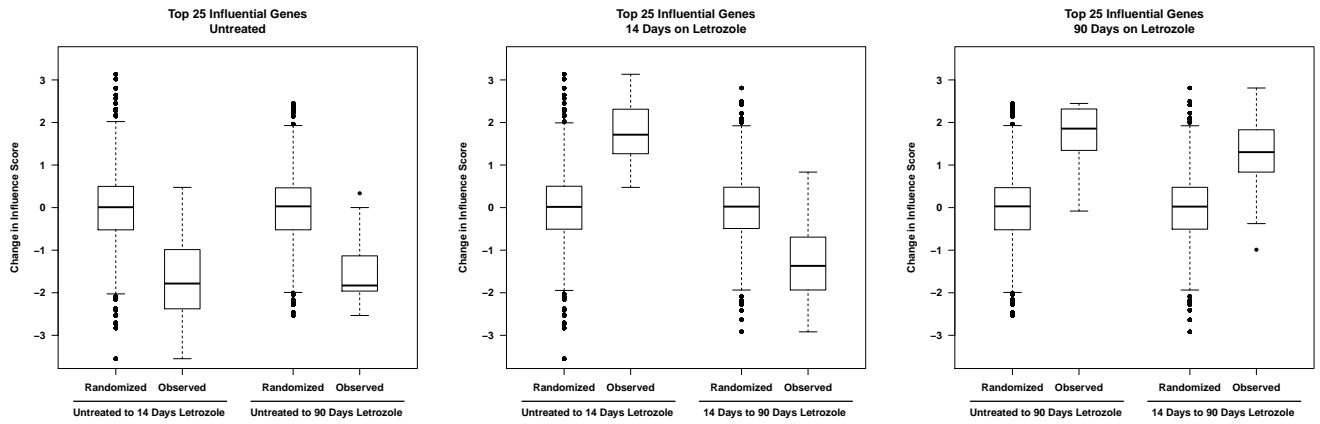

Supplemental Figure 3. The distributions of changes in influence score among the sets of most influential genes (Table 1) at each of three treatment time-points, are statistically significantly different from the distributions of changes in influence scores from equally sized gene sets chosen at random from the same networks. For each comparison,  $p < .001$  as determined by Student's t-test.
